# Supplementary material for: Genome-wide identification and comparative evolutionary analysis of the Dof transcription factor family in physic nut and castor bean
Source: PeerJ journal article supplement (doi:10.7717/peerj.6354), 2019-02-05
Supplement: File_S1_The_gene_model_for_JcDof6.1.pdf [file File_S1_The_gene_model_for_JcDof6.1.pdf]

---

**File S1** The gene model for *JcDof6.1*. The coding region is marked with uppercase letters, above which are its deduced amino acids (the DOF domain is shown in red). The transcribed untranslated regions, including 5' UTR and 3' UTR sequences, are marked with lowercase letters. The start and stop codons are marked with **bold** letters

```
1 tatctatcacttttcttgatcatataattaattcatgttgataggaaatTTGATTGAA
1 M D R G W K P N V E I S P S C
61 gcaatTTGTTGTGATGATAGAGGATGGAAGCCTAATGTTGAAATATCACCAAGTTGC
16 P R C G S T N T K F C Y Y N N Y S L T Q
121 CCTAGGTGTGGTTCTACAAACACTAAATTTTGTACTACAACAATAAGCTTAACACAA
36 P R Y F C K G C R R Y W T K G G S L R N
181 CCGGATATTTTTGCAAAGGTTGCCGGAGGTATTGGACTAAAGGTGGATCGTTAAGGAAT
56 V P V G G G C R K N R R G K S L R L S S
241 GTTCCCGTGGCGGAGGTTGCCGGAAGAATAGAAGAGGAAAATCTTTAAGGCTATCTAGT
76 T H D V H V P H S R S L L G N C G G N N
301 ACTCATGATGTACATGTTCCCTATTCAAGAAGCTTATTAGGTAATTGTGGAGGTAATAAT
96 S N N K G V S P P M E S R N N N S M I S
361 TCTAATAATAAAGGGGTTTCTCCTCCAATGGAGTCTCGTAATAATAATTCCATGATATCG
116 E G S Q I D L A L V Y A N F L N P Q S V
421 GAGGGTTCACAGATTGATCTTGCACTTGTATGCAAATTTCTTGAATCCACAATCAGTT
136 D H S K I T T T A A P T T I T A A A A A
481 GATCATTCTAAAATTACTACTGCTGCTCCGACTACTATAACTGCTGCTGCTGCTGCT
156 T T T G F E M Q E L G S D F D F S G I S
541 ACTACTACGGGATTCGAAATGCAAGAATTGGGTAGTGATTTTGATTTCAGTGGCATTCA
176 S A N L E L T S L A M E E G S M N E N D
601 AGTGCAAATTTGGAATTAAGTCTTGCTATGGAAGAAGGCTCTATGAATGAAAATGAT
196 H Q L M Y Y C G V D S S T N K Q Q L A S
661 CATCAATTGATGTATTATTGTGGAGTGGACTCATCCACAAATAACAACAACACTTGCTAGT
216 N F K I Q E S T S G L P P L P G E E I L
721 AACTTTAAGATTCAAGAATCCACAAGTGGGTTGCCACCATTGCCAGGAGAAGAGATTTTG
236 W D D D N T G N L Q V T Q E P V L G L E
781 TGGGATGATGATAAATACTGGTAACTTGCAGGTCACACAAGAGCCAGTTCTTGGACTTGAA
256 N D Q D P N N L L F G D W S P F D L S S
841 AATGATCAAGATCCTAATAATCTATTGTTCCGGTGATTGGAGTCCGTTTGATTGTCTAGC
276 D D T F S R S *
901 GATGATACTTTTTCAAGAAGTTGAatataactaaatgtgatttttacttttacttttat
961 ccctaaattgtatatgTTTTTAAACGAGTACTACCACATGAGTTCACAATAATGCATACG
1021 gg
```
