# Supplementary material for: Genome-wide identification and comparative evolutionary analysis of the Dof transcription factor family in physic nut and castor bean
Source: PeerJ journal article supplement (doi:10.7717/peerj.6354), 2019-02-05
Supplement: File_S2_The_gene_model_for_JcDof6.2.pdf [file File_S2_The_gene_model_for_JcDof6.2.pdf]

---

1501 ctcagcatcgatcttcttgtaattccatatctcaaagaacttatagttcttggtttaag  
1561 ttatatggaagagctcagaagatgaatcaagaaattgcttctctaaagacatatgagct  
1621 agaaaaccctagaattatagcttttgcattttatt
