# Supplementary material for: Genome-wide identification and comparative evolutionary analysis of the Dof transcription factor family in physic nut and castor bean
Source: PeerJ journal article supplement (doi:10.7717/peerj.6354), 2019-02-05
Supplement: File_S3_The_gene_model_for_JcDof7.2.pdf [file File_S3_The_gene_model_for_JcDof7.2.pdf]

**File S3** The gene model for *JcDof7.2*. The coding region is marked with uppercase letters, above which are its deduced amino acids (the DOF domain is shown in red). The transcribed untranslated regions, including 5' UTR, intron and 3' UTR sequences, are marked with lowercase letters. The start and stop codons are marked with **bold** letters

```

1  atatccctcagaactcgtttcagtgctctccagattctctctctctccataaaaggcc
61  catctctgctcttttgccaccacacaaacacaaacaatccataccaattcca
121 cattctctcttgctgtccattttctcaactcttttaacttttatctctctctctcgaa
181 tattgatcataactaaccaaaagcaaagcagaacaaacaaagaagaacgaaacctaaat
1      M P S D S S S T E T R R L
241 taccacttcccatttcccaaaATGCCATCAGACTCTTCTCCACTGAAACTAGAAAGATT
14  T K P H N T G A P P P D Q E H L P C P R
301 AACTAAACCCATAACACAGGAGCTCCACCGCCAGACCAAGAACACCTTCCATGCCCGG
34  C D S T N T K F C Y Y N N Y N F S Q P R
361 CTGCGATTCTACTAACACTAAGTTCTGCTATTACAACACTATAATTTTCCAGCCTCG
54  H F C K S C R R Y C P P G G T L R A I P
421 TCATTTCTGTAAGTCTTGTCGCCGTTACTGTCCCCCGGGCACCCTTCGTGCCATTCC
74  V G G G T R K N A K R S R T T S S G C T
481 GGTGGTGGTGGCACTCGGAAAAATGCTAAAAGATCACGCACCCTTCTAGTGGTGTAC
94  V V G P M T A N T A D H N I P L P A T P
541 TGTAGTAGGGCCTATGACGGCAACACAGCTGACCATAACATTCCATTACGGGTACACC
114 V L V P L M A K Q G N S I Q F G C G G G
601 AGTACTGGTCCCCTTATGGCCAAACAAGGAAATTCTATACAGTTTGGCTGCGGTGGCGG
134 D G K G N G C G S S G N S T V S G S F T
661 TGATGGGAAGGGGAATGGGTGTGGTCTAGTGGTAATTCTACAGTATCTGGTAGCTTAC
154 S L L N T Q G P G F L A L S G F G L G L
721 TTCTTTGTTGAATACTCAGGGCCCTGGATTCTAGCATTGAGTGGGTTTGGCTTGGACT
174 G S G F E D M G F G L A R G V W P F P G
781 TGGATCTGGGTTTGAAGATATGGGCTTTGGGCTTGCAAGAGGAGTCTGGCCTTTCCCGG
194 V G D G G A G G V G S N G G S A G G M S
841 TGTAGGAGATGGTGGTGTGGCGGTGTTGGTAGCAATGGCGGTTCTGCTGGAGGAATGAG
214 N T W Q F E S G D N G F V G G D C F S W
901 TAACACGTGGCAATTTGAGAGTGGTGATAATGGATTTGTAGGTGGGGATTGCTTTTCTTG
234 P D L A I S T P G N G L K *
961 GCCAGATCTTGCTATTTCAACCCAGGAAATGGTCTTAAATTGAgatattgttcttttagt
1021 agttcttgtttttctctgatgggttagaccaattctaggaaaaaaaaaaaaaaaaaat
1081 taaagaacctgtttgatgggttagttaattaattactactattaagtgttgaga
1141 agataattaggtttgaaattagaaagaaaaatgtaacttttcttactctatttcatg
1201 tgattttgtagttgatgtacctctttttagtagtttcatatacatgccaccttta
1261 aattctcttttctctctagcaaattttaatacaaaccttttattgaatgattatggac
1321 cgactaatcttaatttaatatgaaattcacattttcttctattcattcatgaatgggta
1381 caaatggaatttcccttttagagtttgcagcatatacttcaatttggatattaatataa
1441 taattgactgatttgatttttaggeccacatttaatttttaattcttagtataatttat
1501 aatgatttgctagttcaacattaattgagtgcaatcattctcattgcataag

```
