# Supplementary material for: Genome-wide identification and comparative evolutionary analysis of the Dof transcription factor family in physic nut and castor bean
Source: PeerJ journal article supplement (doi:10.7717/peerj.6354), 2019-02-05
Supplement: File_S4_The_gene_model_for_JcDof7.3.pdf [file File_S4_The_gene_model_for_JcDof7.3.pdf]

---

**File S4** The gene model for *JcDof7.3*. The coding region is marked with uppercase letters, above which are its deduced amino acids (the DOF domain is shown in red). The transcribed untranslated regions, including 5' UTR, intron and 3' UTR sequences, are marked with lowercase letters. The start and stop codons are marked with **bold** letters

```
1 ttttttttttttttttgcaaacttaattaactgaatttaactacttacaaactatcattt
61 ctctgtgcaggagctcaaactattggtgtaacttatggcagagttgctgacaacattcc
121 cttctcatcaagtaataactgtgtgcaaatccaagaacattcaaagaattgaaaaacga
1
181 aacctaattaccacttcccatttcccaaaATGCCATCAGATTCTTCTCCACGGCAAC
11 R R L T K P H N T G A P P A D Q E H L P
241 TAGAAGATTAACCAAACCCATAACACAGGAGCTCCACCGGCAGACCAGGAACACCTTCC
31 C P R C D S T N T K F C Y Y N N Y I F S
301 ATGCCCGCGCTGCGATTCTACTAACACTAAGTTCTGCTATTACAACAATATATTTTTTC
51 Q P R H F C K S C R R S W T H G G T L R
361 CCAGCTCGTCATTCTGTAAAGTCTTGTCGCGTTCCTGGACCCACGGGGCACCTTGG
71 D I P V G G D T R K N A K R S R T S S S
421 TGACATTCCGGTTGGTGGTACACTCGGAAAAATGCTAAAAGATCACGCACCAGTTCTAG
91 G F T V V G P M T A T T G N H N L P L P
481 TGGTTTTACTGTAGTAGGTCCTATGACGGCCACCACAGGTAACCATAACCTTCCATTACC
111 A T P L L A P L M A N Q A S S I Q F G C
541 GGCTACACCACTACTGGCCCCACTTATGGCCAATCAAGCATCGTCTATACAGTTTGGCTG
131 G G G D G K G N V S G S S G N S T V S G
601 CGGTGGCGGTGATGGGAAGGGTAATGTGAGTGGTTCTAGTGGTAATTCTACAGTATCGGG
151 S F T S L L N T Q G P G F L A L S G F G
661 TAGCTTACTTCTTTGTTGAATACTCAGGGCCCTGGGTTTCTAGCATTGAGTGGGTTTGG
171 L G L G S A F E Y M G F G L A R G V W P
721 GCTTGGACTTGGATCTGCGTTTGAATATATGGGCTTTGGGCTTGCAAGAGGAGTCTGGCC
191 F P G V G D G G A G G V G G N G G S A G
781 TTTCCCGGTGTAGGAGATGGTGGTGGTGGTGGTGGTGGTGGTGGTGGTGGTGGTGGTGG
211 G M S N T W Q F P F Y S L Q Y I F Q F V
841 AGGAATGAGTAACACGTGGCAATTTCCCTTTTATAGTTTGCAGTATATATTTCAATTTGT
231 F N I *
901 ATTTAATATATAAAtaattgactgatttgatttttgaggccacatttaaattttaattcc
961 tggcaaaatttataatgatttgctagttcaacattaattgagtgcaatcattctcatagc
1021 ata
```
