# Supplementary material for: Genome-wide identification and comparative evolutionary analysis of the Dof transcription factor family in physic nut and castor bean
Source: PeerJ journal article supplement (doi:10.7717/peerj.6354), 2019-02-05
Supplement: File_S5_The_gene_model_for_JcDof7.4.pdf [file File_S5_The_gene_model_for_JcDof7.4.pdf]

---

**File S5** The gene model for *JcDof7.4*. The coding region is marked with uppercase letters, above which are its deduced amino acids (the DOF domain is shown in red). The transcribed untranslated regions, including 5' UTR, intron and 3' UTR sequences, are marked with lowercase letters. The start and stop codons are marked with **bold** letters

```
1 cttatggttatggttcactctatcttttagccttttagcagcatttttgcttagtattgag
61 ctccatgactttgcaggtatgatataattatttattttttgcaaacttaatta
121 actgaatttaactacttataaactatcatttctctgtgcaggagctcaaactagtggtg
181 taacttatggcagagttgctgacaaccttcccttctcatcaagtaactgtgtgcaa
241 atccaagaacattcaaagaattgaaaaacgaaacctaaattaccacttcccatttccca
1 M P S D S S S T A T R R L T K P H N T G
301 aaATGCCATCAGATTCTTCTCCACGGCAACTAGAAGATTAACCAAACCCATAACACAG
21 A P P A D Q E H L P C P R C D S T T T K
361 GAGCTCCACGGCAGACCAGGAACACCTTCCATGCCCGCTGCGATTCTACAACAACTA
41 F C Y Y N S Y N F S Q P R H F C K S C R
421 AGTTCTGCTATTACAACAGCTATAATTTTCCAGCCTCGTCATTTCTGTAAGTCTGTG
61 R Y W T H G G T L R D I P V G G G T R K
481 GCCGTTACTGGACCCACGGCGGCACCCTTCGTGACATTCCGGTTGGTGGTGGCACTCGGA
81 N A K R S R T T S S G C T V V G P M T A
541 AAAATGCTAAAAGATCACGCACCACTTCTAGTGGTTGTACTGTAGTAGGCCTATGACGG
101 N T G D H N L P L P A T P V L V P L M T
601 CCAACACAGGTGACCATAACCTTCCATTACCGGCTACACCAGTACTGGTCCCACTTATGA
121 N Q A T S I Q F G C G G G D G K G N V C
661 CCAATCAAGCAACGTCTATACAGTTTGGCTGCGGTGGCGGTGATGGGAAGGTAATGTGT
141 G S S G N S T V S G S F T S L L N T Q G
721 GTGGTTCTAGTGGTAATTCTACAGTATCTGGTAGCTTTACTTCTCTGTTGAATACTCAGG
161 P G F L A L S G F G V G L G S G F E D M
781 GTCCTGGATTTCTAGCATTGAGTGGGTTTGGGTTGGACTTGGATCTGGGTTTGAAGATA
181 G F G L A R G V W P F P G V G E G G A G
841 TGGGCTTTGGGCTTGCAAGAGGAGTCTGGCCTTTTCCCGGTGTAGGAGAAGGTGGTCCG
201 G V G S N G G S A G G M S N T W Q F E S
901 GTGGTGTGGTAGCAATGGCGGTTCTGCTGGAGGAATGAGTAACACGTGGCAATTTGAGA
221 G D N G F V G G D C F S W P D L A I S T
961 GTGGTGATAATGGATTTGTAGGTGGGATTGCTTTTCTGGCCAGATCTTGCTATTTCAA
241 P G N G L K *
1021 CCCCAGGAAATGGTCTTAAATGAgatattgttcttttagtagttcttgttttttctctta
1081 taggttttagacttagaccaattctaggaaaaaaaaaaaaaaaaaaaaaaattaaagaacc
1141 ttgtttgacgggttagttaattaataactactactattaagtgttgagaagataatta
1201 ggt
```
