# Supplementary material for: Genome-wide identification and comparative evolutionary analysis of the Dof transcription factor family in physic nut and castor bean
Source: PeerJ journal article supplement (doi:10.7717/peerj.6354), 2019-02-05
Supplement: File_S6_The_gene_model_for_RcDof02.pdf [file File_S6_The_gene_model_for_RcDof02.pdf]

**File S6** The gene model for *RcDof02*. The coding region is marked with uppercase letters, above which are its deduced amino acids (the DOF domain is shown in red). The transcribed untranslated regions, including 5' UTR, intron and 3' UTR sequences, are marked with lowercase letters. The start and stop codons are marked with **bold** letters

```

1  tcctctctctctctccctctcttctattgcctccttgatccatcagaacaccacaaca
1                                     M S
61  caagtttaaggataccatctcatcatcacattaactttattacaagtagcagaaATGTCC
3  E G I K L F G K T I P L P A L Y H L S S
121 GAAGGGATTAAGCTGTTTGGCAAGACCATTCCATTGCCAGCTCTTTACCACTTATCTTCT
23  A N D P C S Q A T G D D L D D F S D K T
181 GCTAATGACCCTGTTCACAAGCAACAGGAGATGATCTCGATGACTTCTCCGATAAAACT
43  T A S L H E Y D S V K E Q Q A Q D T N R
241 ACTGCTCTTTACATGAATATGACTCTGTAAAGGAACAACAAGCCCAAGATACGAATAGG
301 gtatgttttcgtgtatgtttatggatataagaatgattgagcttgaattcctcgttggtc
361 atatgtgttttagtatttgcaaattctaagaacaattcatctctctttttctaaatatca
421 tggaagtttcttgcctttcagattttggttagccaattttatattgtagttatTTTTT
481 atcaactcattcctagtttttctgttgtttctggtggctggaatgtctatacgttgacct
541 caagctaattggcttccatTTTTaaataaactacatttctttccggtataggaactggg
601 tgagctgtatcttcaactattgtacccttccaagttcatttctgtattagtaattgctgc
661 atagaattcTTTgaagatctccagctaccagacttaataagagatcttgcgtatcccac
721 tgtccaggcgatatttcatactaaagagctcattatgaatttagttatTTTgagttcagg
781 aaatttcgcaaggactggtgagaaggacatttgatctttttattatttagaaaaaagaac
841 atttcagtatttcagaattgctttctgaatagagtcttcacattattgacaagtgatcc
901 agcaaattaagacttcaattttacagaatattgataatttgtggcctataacttcttcta
961 tttcttttaggatcagaaaagacaagatttcgtaactttcgatagttactgagataggtt
1021 ttggtgttttcttatgtttgtttgaactaccaatTTTccagcttggttacttgccttct
63  E P S G K E V T D D K Q E V S
1081 ttgatctttgctatagGAACCTTCAGGAAAAGAAGTCACTGATGATAAAACAAGAAGTTAG
78  T S N Q E A E D L K D P T T T Q S R I N
1141 CACCTCAAATCAAGAAGCTGAGGACTTAAAAGATCCAACAACAACAATCACGAATTA
98  E K P E T S S A N R E T S P S K E S S E
1201 TGAAAAGCCTGAAACTTCTCAGCGAACAGAGAAACTTACCATCCAAAAGAAAGCTCTGA
118  N G E Q Q N E T S N N S Q E K T L K K P
1261 GAATGGAGAACAACAAAATGAGACAAGTAATAACTCGCAAGAAAAGACCTTAAAGAAACC
138  D K I L P C P R C N S M D T K F C Y Y N
1321 TGACAAAATACTCCCATGCCCTCGATGTAATAGCATGGATACAAAATTCTGCTATTATAA
158  N Y N V N Q P R H F C K N C Q R Y W T A
1381 CAATTATAATGTCAATCAGCCCGCCATTTCTGCAAGAACTGTCAAAGATACTGGACTGC
178  G G T M R N V P V G A G R R K N K S S S
1441 TGGAGGAACCATGAGGAATGTACCTGTTGGCGCTGGACGGCGAAAAACAAGAGCTCTTC
198  A S H Y R H I I V S E A L R T A Q G H A
1501 CGCATCACATTACGGCACATAATTGTATCAGAAGCTTTACGAACAGACAAGGCCATGC
218  L N G V H N P S F G S S S T V L T F G A
1561 TTTGAATGGGGTTACAACCCTTCTTTTGAAGTAGCAGTACTGTCTTACCTTTGGTGC
238  D S P L C E S V A S V L N L S E K N G Y
1621 AGATTCTCTCTTTGCGAATCTGTAGCTTCCGTGCTGAATCTTTCAGAGAAAAATGGATA
258  H R P E Q R I L V P C G R T A D N G D D
1681 CCATAGACCTGAACAAAAGAAATCTTGTTCCTTGTGGAAGAACAGCTGATAACGGGGACGA
278  R L S R N S V T A S N A L E K G G K R V

```

---

1741 TAGATTGAGTAGAAAATTCTGTCACAGCTTCGAATGCATTAGAGAAGGGAGGTAAAAGGGT  
298 S Q E T V T K N Y Q G I A P Q I P C F P  
1801 TTCGCAAGAAACAGTTACTAAAAATTATCAAGGCATTGCTCCTCAGATACCATGCTTTCC  
318 G P P W P Y P W S S P L P T P P T F C P  
1861 AGGGCCACCTTGGCCTTATCCATGGAGTTCCCCATTGCCTACTCCACCTACTTTTTGGCC  
338 S G F P V S F Y P A P A Y W G C T V P N  
1921 TTCAGGATTTCCAGTATCATTTTATCCTGCACCAGCCTATTGGGGTGTACTGTCCAAA  
358 P W N V P P C L S P Q S P S V N H R A A  
1981 TCCATGGAATGTTCTCCATGTCTATCTCCACAATCGCCTCAGTAAATCACCGCGCAGC  
378 A S L S P T S P L G K H S R E G N I L K  
2041 GGCAGCTTGAGTCTACGTCTCCATTAGGAAACATTCAAGGGAAGGTAATATCCTGAA  
398 P V N S E E P S G E S N C T E R S V L A  
2101 ACCTGTCAATTCCGAAGAGCCTTCGGGAGAGAGCAATTGCACGAAAGAAGTGTTTGGC  
418 P K A L R I D D P T E A V T S S I W A T  
2161 TCCAAAAGCTTTGAGGATTGATGACCCAACCGAAGCTGTAACAAGCTCAATATGGGCAAC  
438 L G I K C E K T N L N G G L F E G F Q S  
2221 TCTTGGGATCAAGTGTGAAAAACAAATTTGAATGGAGGACTCTTTGAAGGATTTGAGTC  
458 K N E N R N Y I A E R K S S V L Q V N P  
2281 GAAAAATGAAAACAGAAATTACATAGCTGAGAGAAAATCTTCGGTGTGCAAGTCAATCC  
478 A A L S W S L N F H E S T \*  
2341 GGCTGCCTTGTCGTGGTCTCTCAACTTCCATGAGAGCACCTGAtgaaaggaattgagatg  
2401 catgtacactgttgcctctcacacaacaacaatgtttttcccgaacaagcaacgaatg  
2461 gaccgacttgatcagttgtggagtatatccaatatagaggaaacccaaaaaatagg  
2521 aacctatcttacctacaggagaccatagcctctaatacgccttcatagcataatgatcaa  
2581 ccggtgttttgaccttagatggtttttttctttcaagttttgtgtacatatata  
2641 tgtgagagtgtgtgacatgtaccttgaaacaaaagagaatcttgatgtcataaaattca  
2701 aaaataactggaaaatttcagttcaataacttttatggetctagc
