# Supplementary material for: Genome-wide identification and comparative evolutionary analysis of the Dof transcription factor family in physic nut and castor bean
Source: PeerJ journal article supplement (doi:10.7717/peerj.6354), 2019-02-05
Supplement: File_S7_The_gene_model_for_RcDof05.pdf [file File_S7_The_gene_model_for_RcDof05.pdf]

**File S7** The gene model for *RcDof05*. The coding region is marked with uppercase letters, above which are its deduced amino acids (the DOF domain is shown in red). The transcribed untranslated regions, including 5' UTR, intron and 3' UTR sequences, are marked with lowercase letters. The start and stop codons are marked with **bold** letters

```

1 aacaattctttaattcctttgcacttttttagagcttgattgattgcatatgtatgtatat
61 ataagcacattctcttcccttctcctttctgcagcccttcttttctttcaagctcttc
1      M A N N Q E E G I K L F G T T I T
121 tctttctttaATGGCTAATAATCAGGAAGAGGGTATTAAGCTCTTTGGAACGACAATTAC
18 L H G K Q E V K E D Q N K E N S T P E K
181 GTTGCATGGTAAGCAAGAAGTTAAAGAAGACCAAAACAAAGAAAATCAACGCCTGAAAA
38 I I P C P R C K S M E T K F C Y F N N Y
241 GATTATACCATGCCCCAGATGCAAGAGCATGGAGACTAAATTTTGTACTTTAACAACATA
58 N V N Q P R H F C K G C Q R Y W T A G G
301 TAATGTTAATCAGCCTAGACACTTCTGCAAGGGCTGCCAAAGATACTGGACGGCAGGTGG
78 A L R N V P V G A G R R K T K L P G R P
361 GGCTCTTCGTAATGTTCTGTGGTGCCGGTCGCCGTAACCAAGCTACCTGGACGCC
98 D G C L Y D G S S G V D P F E L D G R V
421 AGATGGATGCTTGTATGATGGCTCTAGTGGAGTGGATCCATTTGAGCTTGATGGCAGGGT
118 I V E E W Q V A S H G G F R H V F P V K
481 GATCGTTGAGGAATGGCAGGTTGCATCCCATGGTGGTTCCGGCATGTTTTCCCGTGAA
138 R R R S N T V
541 GCGGAGGCGGAGCAACACAGgttgtgcaatgtactgattttgacatcttgtcttttctc
601 ttcaaccatatttttagagaatatatgcaatatagacagatatataaaactaccgcacgtc
661 tagcttattagtcttgttttcgcagtacataataataaaacttcagaagatgacaat
721 tcttgtaatcctggttttcattttcttttctgtttaatgttcgtagtgtacagtttcg
781 acgacatataagtcatacatattttatgcgtagagcacatccagaatcaattatttaga
145                                     Q H E A Q
841 tgcttcataacatgtcttagggatggtgtgtttcccatattgcagTTCAACATGAAGCTC
150 *
901 AGTGAttagcagatcatattttggtgttgagagatgtatattttaaggtgaccataaaat
961 atgagtaggtgatccagatcaatctcatcatcatcgagaggctatgatccaattcaatca
1021 aatttgatgctttgagagtcacaagatcgatcagatgcgggcatgcagttgatcttgat
1081 cagtgatcgatcgagctgattg

```
