# Supplementary material for: Genome-wide identification and comparative evolutionary analysis of the Dof transcription factor family in physic nut and castor bean
Source: PeerJ journal article supplement (doi:10.7717/peerj.6354), 2019-02-05
Supplement: File_S9_The_gene_model_for_RcDof13.pdf [file File_S9_The_gene_model_for_RcDof13.pdf]

**File S9** The gene model for *RcDof13* The coding region is marked with uppercase letters, above which are its deduced amino acids (the DOF domain is shown in red). The transcribed untranslated regions, including 5' UTR, intron and 3' UTR sequences, are marked with lowercase letters. The start and stop codons are marked with **bold** letters

```

1 tccaacacccaccctacttaccctgcattacacacatggtctcttgcgatcaactctgc
61 ttgatctcttctcttcttatatatatttgcatacttaaacataatgcgtgtttacaaaa
1 M F T S D H H Q I M L Q C S A R P L P M
121 tATGTTCAGTACTAGTGACCACCACCAATCATGTTGCAGTGTCTGCTAGGCCTTTGCCAAT
21 E G K W K T H V E L A P S C P R C A S S
181 GGAGGGAAAGTGGAAAACCCATGTTGAACTTGCTCCTAGTTGCCCCCGTTGTGCCTCTTC
41 N T K F C Y Y N N Y S L S Q P R Y F C K
241 CAATACTAAATTCTGTTATTACAACAACCTACAGCTTGTCTCAGCCTAGATATTTTTGTAA
61 G C R R Y W T K G G S L R N V P V G G G
301 AGGTCGCAGACGGTATTGGACTAAAGGCGGTTCTCTAAGAAATGTTCCCTGTTGGAGGTGG
81 C R K S R R A K S S R G A V S M N Y G K
361 CTGTCGTAAAAGTCGCAGAGCTAAGTCTTCTCGTGGCGCAGTTTCGATGAATTATGGCAA
101 N F N G P L S G S S C S S N M D S T V Q
421 GAATTTAATGGCCCGTTGAGTGGTAGTTCTGTTCGTCTAACATGGACTCTACGGTTCA
121 E T G S N N D G S E I D L A V V F A K F
481 AGAGACTGGAAGTAATAATGATGGTTCGGAAATTGATTGGCCGTCGTTTTCGCTAAGTT
141 L N Q E S S F Q P E F V G K E L P D E P
541 CTTGAATCAAGAATCGAGTTTTCAACCTGAGTTTGTGGGAAAGAATGCCTGATGAGCC
161 S D Q E L V S V A N S L S P P D S D A V
601 TAGTGATCAAGAAGTGGTAAGTGTGGCAATTCTTTAAGTCTCCTGACAGTGATGCAGT
181 I E C Q N L I G E S I Q E S N D L L Q A
661 CATCGAATGCCAGAACCTGATCGGCGAAAGCATCCAAGAATCTAATGATTTACTACAAGC
201 L L V A G N Q D Q E Q G D Q E M I M E S
721 GTTGCTTGTGCTGGAAATCAGGATCAGGAACAAGGAGATCAAGAAATGATCATGGAAAG
221 Q D M N E F G L Q T L L G D E I V Q D A
781 TCAAGACATGAATGAATTCGGATTACAACTTTGCTAGGCGATGAAATAGTGCAGGATGC
241 L W S E A E T S L S N V T W Q I P V D Q
841 TTTGTGGTCTGAAGCTGAAACATCTCTGTCGAATGTTACATGGCAAATACCAGTTGATCA
261 V Q P Q G F D S F S V D D Q L K I P T N
901 GGTACAGCCGAAGATTTGATTCATTCTCAGTGGATGATCAACTTAAGATTCCAACGAA
281 L I N D N A W S S F D L S A G F E V F S
961 TCTTATAAATGATAATGCTTGGAGTTCTTTCGATCTCTCTGCAGGATTTGAGGTTTTCTC
301 R S Y *
1021 GAGATCTTATTAGacgtataattcacaggaacatttactttcaatTTTTTcttctataatt
1081 tacatatttttgcctctcttcaagaaatttgatttttactgtcacgtttcccatgaaa
1141 acagtcatggtatatagatactgcagatagagatagtgcaataaaacgatataatacaaat
1201 attccccctgtcattcatcagtttggttgatctatggatcaaagcaataagattaacaa
1261 atatacattattatatta

```
