# Supplementary material for: Genome-wide identification and comparative evolutionary analysis of the Dof transcription factor family in physic nut and castor bean
Source: PeerJ journal article supplement (doi:10.7717/peerj.6354), 2019-02-05
Supplement: File_S10_The_gene_model_for_RcDof17.pdf [file File_S10_The_gene_model_for_RcDof17.pdf]

**File S10** The gene model for *RcDof17*. The coding region is marked with uppercase letters, above which are its deduced amino acids (the DOF domain is shown in red). The transcribed untranslated regions, including 5' UTR, intron and 3' UTR sequences, are marked with lowercase letters. The start and stop codons are marked with **bold** letters.

```

1  cagctctctctctctctatctatctcctttagactcacttgagtagtgactttttcttg
61  cttcttattcacaacccacgccaactccatttctctacatgacaaattcaatctccttcat
121 tcacttctgtcctctttacaatcctcttctctgtcaccatagaattccagtttccctc
181 ctcttactacttgtctccatcatcttcttctattcttgcagtggtcagtgaaactgccaat
241 atgaaataaatttaagtgtggtgtgaagtgttgctgaattggttttgctcgagtctgttg
1  M S L T S L
301 tttccttttgctctttttgttgctagaacttggtttggtttaATGAGTCTTACTCACTT
7  Q V C M D S T D W L Q
361 CAAGTTGCATGGATTCCACTGATTGGCTTCAGgtaaagctatatctcattacttacttg
421 agcttgattattggacatgatgtgttaggttatattgaatatgtacctgtaaaagtacaa
481 atggtgtaaataatgtaatggggacaattttgtttatttcttggactgttcttgataag
541 gcataatgtaagtaaaggcttaaaactggcatgaaattgtatctgaactatatgttctcaag
601 aacaagttatcatgaattgaaatgaactgcagcaccgaaaattggtgaaatgaaacgata
661 ttctcttttatatccatgaaattcttctgcacaagtatgataagatatcctataatta
721 aattcgaccttctggtttttcataaatttggaaccttatgcacgtacatttttgaaagt
781 ttcttgttcttggcatgtgtgaatctctggcatttttggaaattaataaattcagacatt
841 ctagctatctagatgtgtgaaagactgaaagaatgtctctggctcttttgcatattaat
901 atctttaaaggacaaaggaatttcacaatttcaattctctaaaaccttaaaattattg
961 caattgatgctgataggaacatgtctgacacatttctccatcataattttcttttcttt
18  G T I H E E T G M D S S
1021 cttttcttgctttccttgtgtcagGGTACGATTCACGAGGAGACTGGAATGGATTCTTCT
30  S P S G D M L T C S R P L I E R R L R P
1081 TCCCCTCGGGGATATGCTAACATGTTCAAGGCCATTGATAGAGAGGAGGCTTAGGCCA
50  P H D Q A L K C P R C D S T H T K F C Y
1141 CCGCATGACCAAGCTCTAAAGTGTCCAAGGTGCGACTCAACACACACCAAATTTTGTTAC
70  Y N N Y S L S Q P R Y F C K T C R R Y W
1201 TACAACAATTACAGTCTTTCTCAGCCAAGTACTTCTGCAAGACTTGCAGAAGTACTGG
90  T K G G T L R N I P V G G G C R K N K K
1261 ACTAAAGGGGGACTTTAAGGAACATTCCCTGTTGGTGGTGGGTGTAGAAAGAATAAGAAA
110  V A K K S N S N E H H Q P I N Q N N L G
1321 GTAGCTAAAAAATCGAACAGTAATGAACATCATCAACCCATTAACCAGAACACCTCGGA
130  S S S S H H N P T D L H L S F P D Q V Q
1381 TCATCATCTTCTCATATAATCCTACTGATCTTCACCTTCATTTCCCTGATCAAGTCCAA
150  F S H L N N I L N T Q G T L A N P T F M
1441 TTCTCATCTTAATAACATACTTAACACTCAAGGGACTTGCAAACCCTACTTTCATG
170  E S K Y S I G M L E N P R P I D F M E S
1501 GAGAGTAAGTACAGCATCGGTATGCTTGAAAACCTAGGCCTATTGACTTTATGGAGAGC
190  K L E A I V G S S S T S R N Y D F M G N
1561 AAGTTAGAAGCAATAGTTGGATCATCAAGCACTTCTAGGAACTATGATTTTATGGGGAAT
210  S D M G M V S G L G D Q I N H H H H H H
1621 AGTGATATGGGCATGGTTAGTGGGCTTGGAGATCAAATTAATCATCATCATCATCATCAT
230  H H H Q G L A P N Y H G L C S P F G M S
1681 CATCATCACCAGGATTAGCACAAACTATCACGGTCTTTGCTCTCCATTTGGTATGTCC
250  M D G S N G T F M E T C Q R L M L P Y D
1741 ATGGATGGGAGTAACGGAACGTTTCATGGAAACTTGCCAAAGGTTAATGCTTCCGTATGAC

```

---

270 H Q G N D E Q N T I D V K P N A K L L S  
1801 CATCAAGGGAATGATGAGCAAAACACAATCGATGTCAAGCCCAATGCGAAGCTCTTATCC  
290 L E W Q E Q G Q G C S H D G G K D T F G  
1861 CTTGAATGGCAAGAGCAAGGTCAAGGGTCTCATGATGGTGGGAAAGACACATTGGG  
310 Y L N N L G S S W T G M M N G Y G S S T  
1921 TACTTAAACAATTTGGGATCATCATGGACCGGGATGATGAATGGTTATGGATCATCAACA  
330 T N P L V \*  
1981 ACCAACCCCTTTGGGTAAAtctaaaagaacatcaattcgctttgataatggaaaggtttt  
2041 gttatcttctcttttgggtgcttcttctattataagtggtcatatatatgaaattatca  
2101 ttgacttgacaaaggagcagcagcagaaggggtgtgtgaatgagaagtttaagagtcca  
2161 aaaatgactgccttagtatcttactgttt
