# Supplementary material for: Genome-wide identification and comparative evolutionary analysis of the Dof transcription factor family in physic nut and castor bean
Source: PeerJ journal article supplement (doi:10.7717/peerj.6354), 2019-02-05
Supplement: File_S11_The_gene_model_for_RcDof18.pdf [file File_S11_The_gene_model_for_RcDof18.pdf]

**File S11** The gene model for *RcDof18*. The coding region is marked with uppercase letters, above which are its deduced amino acids (the DOF domain is shown in red). The transcribed untranslated regions, including 5' UTR, intron and 3' UTR sequences, are marked with lowercase letters. The start and stop codons are marked with **bold** letters

```

1  tgggtgggtggctggctggacgatgatgatgatggcgatggtgataaaaaagaatccggt
61  gcagatTTTTatagaaacccaaagaaaggaaagtactcgaatTTTctcttaataactgcaa
121 atatTTTatTTTTatatttatatgataatttattatTTTtcatTTtaattcgcTTTctct
181 gcgtgcaagctTTtatatataactaacatctgatcatctctccttactccaatttcatcat
241 tgccactctctctctctctctTTTTccatTTTTctTTTtcaagactattatactTTgc
1      M L S F F L
301 tgctttatatatTTaaagagctgccttctctctcactTTgcATGCTCTCTTTCTTCT
7  L S L N L S F L N Y T N R L S F K K D T
361 ACTTCTTTGAATCTCTCTTTTCTTAACTACCAATAGATTGAGTTCAAGAAAGACAC
27  V Y R P K T T R K E R K G L I W F L A W
421 TGTTTATCGCCCAAAAACAACAAGGAAAGAAAGAAAGGGTTTGATTGGTTTCTTGCATG
47  M D P S S G Q H Q
481 GATGGATCCTTCTAGCGGACAACACCAGgtagggttattcacagcatggatatatatata
541 tatatatatatatatatgTTTccactataatccttctcttTgTTTctgctatctaa
601 ttaacatacctctggatTTTTctTTTTctTTTTctTTTTctTTTcaagtgattTtgatgagt
661 tctTTTggcctctctctTTTTccTTTTtattTggaaggctctccttctTTTtagatc
721 atTTggctctcatttacaacgattTTTTctTTTTctTTTtaacctTTTTTTTTTgtgtg
781 ttcatTaatccatggggatagctTggattgatgaatgaatcacatgaattTgattTtca
841 ctTggaaaagaaagtacagTtgcTTaatgatatagTtttcaatcattTctgagctaat
901 acccatcattTctctcctTgatctacactaaacaattcctTTtatgattTctTTTTctt
961 gaagTcatgtatggagaggtgaaatttataacaagaaaaagataaaaaattccttctgc
1021 tatattTctatTTTgctTgtcaagaaaaatgagagaaagctaaaaacaacatgtaatta
1081 atcctctTTTTtagccctagctTTTgTtctTgTtcttaggatagTaaataggtatcataag
1141 gtatatataatactTTTTccTTTTtcaattTTTTctgataactattTaaacaattcaaga
1201 ttaagaggaacacaattagggtctTaaaggatgtgattgattTctTgcaattactTgta
1261 tTctatcaaatgaatatgTTTgaagtacatatacactTgTtaggtaagagataaaagt
1321 cattTgatgcaatTggtctaatcgTtcatctctTTTTctgTtTgTtTctTTTTctttat
56      E I P T H S L E N M L V C S K
1381 tTTtaaccaattcagGAAATTCCTACACATTCATTGGAGAATATGTTGGTTTGCTCAAAA
71  P H Q E R K P R P Q P E Q A L K C P R C
1441 CCACATCAAGAAAGAAAACCAAGACCACAACCAGAACAAGCTCTAAAATGTCCAAGATGT
91  D S T N T K F C Y Y N N Y S L S Q P R Y
1501 GATTCTACCAACACTAAATTCTGCTACTACAACAATTACAGCCTTTCTCAGCCAAGGTAT
111  F C K S C R R Y W T K G G T L R N V P V
1561 TTTTGAAGTCATGCAGAAGGTACTGGACTAAAGGAGGAACCCTGAGAAAATGTTCCAGTA
131  G G G C R K N K R S T K K A Q D H H Q L
1621 GGTGGAGGTTGTAGAAAGAACAAAAGATCAACAAAGAAGGCACAAGATCATCATCAATTG
151  N P H T N P L T G L P P L S Y D S N D L
1681 AATCCTCATACCAACCCACTTACTGGTCTCCCCCTTTAAGTTATGATTCCAATGACCTT
171  T L A F A R L Q K Q S S G Q L G F D D N
1741 ACTCTTGCCTTTGCTAGACTTCAGAAGCAGTCTAGTGGGCAGTTAGGGTTTGTGACAAT
191  D F S I L G N P S N A H C D I M L G N P
1801 GATTTCTCTATTTTGGGAAACCCAGCAATGCCACTGTGATATAATGCTTGGGAACCCCT
211  N S I N T S A S T P S F L D A L R S G F
1861 AACAGCATTAACTTCACTTCACTCCATCATTCTTGTGCTTTAAGGAGTGGGTTT

```

---

231 L D T Q N N N F Q N L Y Y G Y G N G S I  
1921 CTTGATACCCAAAATAACAACCTTTCAGAATTTGTATTATGGGTATGGAAATGGGAGCATT  
251 D D V E N S G G V C V S G E M M L P Y D  
1981 GATGATGTGGAAAATAGTGGAGGGGTTTGTGTTAGTGGAGAAATGATGTTGCCTTATGAT  
271 H Q D V S T S A A T Q A V T V T T M K Q  
2041 CATCAAGATGTAAGTACTAGTGCAGCCACACAAGCTGTGACAGTGACAACAATGAAGCAA  
291 E F C N G R E D H N S N N S K V L F G F  
2101 GAGTTTGCAATGGTAGAGAAGATCATAACAGCAATAATAGTAAGGTCTTGTGGCTTT  
311 P W Q I N G N G I S D L D S G R E S W N  
2161 CCCTGGCAGATAAATGGTAATGGGATCAGTGATCTTGATTCAGGAAGAGAAAGCTGGAAC  
331 N H G L G N S T W H G L I N S P L M \*  
2221 AATCATGGACTTGTAATTCACCTGGCATGGACTTATCAACAGTCCTCTAATGTAGtag  
2281 aactgcagcagcttaattagctaagaaagaaaaagaaaaagaaagaaaaagaaag  
2341 aagaacctgcaaaacccaagaacaagaatagagttttcttttcttattattagactcaa  
2401 aatctcagtttttaggctcttgagttttgtttttagaagatttgattccactgaatcat  
2461 ctctatcttaatttttctttttttttttttttttttttccctctcttgtttctttta  
2521 ttgttttttcttttatataaataactaatgaaaattgtttgctaacc
