# Supplementary material for: Genome-wide identification and comparative evolutionary analysis of the Dof transcription factor family in physic nut and castor bean
Source: PeerJ journal article supplement (doi:10.7717/peerj.6354), 2019-02-05
Supplement: File_S12_The_gene_model_for_RcDof19.pdf [file File_S12_The_gene_model_for_RcDof19.pdf]

---

1801 cgtttacgtggtgaaagttgtccaggactaacagatagggattcttctcttctctctct  
1861 ttcattactatTTTTgagcagttgtaaaaaatTTTgaagctcatttgcttggcttcaa  
1921 aagggttttcctttacacatttatatataattggtgtgagagtgagatagaagaagat  
1981 gtgaatacaagtctaagtgggttttcttcatggcagcatagcatggactgtattcata  
2041 aattcttctatctgaattagatcaagtacctgcgctcttgttgatttggtttccacttt  
2101 ccagagttggcctcagtttatTTTTgtttattcaatgcgaaactgagatttcatac  
2161 acatcatatcaaacttcgattcagccaatgatattcttt
