# Supplementary material for: Genome-wide identification and comparative evolutionary analysis of the Dof transcription factor family in physic nut and castor bean
Source: PeerJ journal article supplement (doi:10.7717/peerj.6354), 2019-02-05
Supplement: File_S13_The_gene_model_for_RcDof23.pdf [file File_S13_The_gene_model_for_RcDof23.pdf]

---

1501 ttaaagaaaatcacaagtagttaggatcatcattttcatcaatcactcgtcttcttgaat  
1561 ctccatagctggaaatcttactgctcaagttcaagatagaggagtttgaagatggatga  
1621 aggagtttgcttctttcaagattaactagaaaaccctagaacggtaggcttttgccttc  
1681 ttcttttttcttttttggttttctggagtacttcgtttctttcttacttcttattgt  
1741 agttttaggttgcgatgtagtagcatgtttaccacagatgagcgtatggtgaatctatgc  
1801 gagctagtttgtatcacatacatatgctgatgaaaactatatgttttgagttccatag  
1861 aacttgatgattcaaaa
