# Supplementary material for: Genome-wide identification and comparative evolutionary analysis of the Dof transcription factor family in physic nut and castor bean
Source: PeerJ. 2019 Feb 5;7:e6354. doi: 10.7717/peerj.6354 (PMC6368027; doi:10.7717/peerj.6354)
Supplement: Supplemental Information 15 — Detailed information of Dof family genes in Arabidopsis and rice. [file peerj-07-6354-s015.xlsx]

## Sheet: Sheet1
Table S1 Detailed information of Dof family genes in Arabidopsis and rice.
Gene name	Other name	Locus	Position	Intron NO.	AA	MW (kDa)	pI	GRAVY	Dof location	Loca	Duplicate	Modeb	Ka/Ks	Groupc
AtDof1.1	OBP2	AT1G07640	chr1:2355798-2354707	1	331	35.59	9.53	-0.718	74-132	Nucl	AT2G28810	Alpha WGD	0.2299	B1
AtDof1.2	–	AT1G21340	chr1:7476087-7476869	0	260	29.68	4.73	-0.844	36-93	Nucl				C2.2
AtDof1.3	–	AT1G26790	chr1:9275312-9273857	1	372	42.01	6.8	-0.85	108-166	Nucl	AT1G69570	Alpha WGD	0.3821	D1
AtDof1.4	–	AT1G28310	chr1:9913685-9912534	1	325	35.44	9.27	-0.665	38-96	Nucl				B2
AtDof1.5	COG1	AT1G29160	chr1:10184324-10183797	0	175	19.42	9.37	-0.649	59-117	Nucl	AT2G34140	Alpha WGD	0.1653	D1
AtDof1.6		AT1G47655	chr1:17525437-17526066	0	209	22.29	6.71	-0.563	26-84	Nucl				D2
AtDof1.7	DOF1	AT1G51700	chr1:19174266-19174850	0	194	21.68	8.96	-0.963	30-88	Nucl	AT3G21270	Alpha WGD	0.4591	A
AtDof1.8	–	AT1G64620	chr1:24007288-24008460	1	352	37.88	7.66	-0.678	46-104	Nucl	AT4G24060	Beta WGD	0.1965	C2.1
AtDof1.10	CDF5	AT1G69570	chr1:26163230-26161771	1	399	44.01	8.92	-0.847	129-187	Nucl				D1
AtDof2.1	–	AT2G28510	chr2:12200627-12199383	1	288	31.78	8.11	-0.849	45-103	Nucl	AT5G60200	Beta WGD	0.1643	C1
AtDof2.2	–	AT2G28810	chr2:12365377-12363426	1	323	34.75	9.59	-0.785	74-132	Nucl				B1
AtDof2.3	CDF4	AT2G34140	chr2:14414700-14414188	0	170	18.93	9.39	-0.622	55-113	Nucl				D1
AtDof2.4	–	AT2G37590	chr2:15769292-15770497	1	330	35.33	9.26	-0.733	86-144	Nucl	AT5G02460	Beta WGD	0.1927	B1
AtDof2.5	DAG2	AT2G46590	chr2:19133166-19134905	1	369	40.54	9.06	-0.853	77-135	Nucl	AT3G61850	Alpha WGD	0.2408	C2.1
AtDof3.1	DOF2	AT3G21270	chr3:7474934-7475548	0	204	22.53	9.34	-1.106	26-84	Nucl				A
AtDof3.2	DOF6	AT3G45610	chr3:16740352-16739530	1	245	26.96	9.11	-0.724	37-95	Nucl	AT5G60200	Alpha WGD	0.2112	C1
AtDof3.3	CDF3	AT3G47500	chr3:17505964-17504276	1	448	49.73	6.61	-0.917	107-165	Nucl	AT5G62430	Alpha WGD	0.1649	D1
AtDof3.4	OBP1	AT3G50410	chr3:18709872-18710633	0	253	26.38	8.72	-0.328	27-85	Nucl	AT5G66940	Alpha WGD	0.2577	D2
AtDof3.5	–	AT3G52440	chr3:19435447-19436190	0	247	26.94	5.05	-0.52	22-80	Nucl				C2.2
AtDof3.6	OBP3	AT3G55370	chr3 20527198-20528876	2	323	35.52	9.43	-0.725	73-131	Nucl	AT5G02460	Beta WGD	0.0919	B1
AtDof3.7	DAG1, BBFa	AT3G61850	chr3:22895495-22897150	2	296	32.97	9.4	-0.919	71-129	Nucl				C2.1
AtDof4.1	ITD1	AT4G00940	chr4:404204-403320	0	294	33.39	6.99	-1.145	65-123	Nucl	AT3G61850	Beta WGD	0.2055	C2.1
AtDof4.2	–	AT4G21030	chr4:11231414-11231998	0	194	22.11	5.46	-0.711	19-75	Nucl	AT4G21040	Tandem	0.4551	C3
AtDof4.3	–	AT4G21040	chr4:11235505-11234807	0	232	26.08	8.59	-0.806	23-80	Nucl	AT4G21050	Tandem	0.3649	C3
AtDof4.4	–	AT4G21050	chr4:11238441-11239073	0	210	23.97	5.72	-0.748	22-79	Nucl				C3
AtDof4.5	–	AT4G21080	chr4:11255351-11254602	0	249	28.09	8.65	-0.835	23-80	Nucl	AT4G21040	Proximal	0.2266	C3
AtDof4.6	–	AT4G24060	chr4:12503970-12505417	1	342	37.35	7.27	-0.882	50-108	Nucl				C2.1
AtDof4.7		AT4G38000	chr4:17858436-17859176	0	246	27.39	9.43	-0.678	38-96	Nucl	AT5G65590	Beta WGD	0.2617	B2
AtDof5.1	–	AT5G02460	chr5:541058-539549	1	399	42.53	9.17	-0.616	92-150	Nucl				B1
AtDof5.2	CDF2	AT5G39660	chr5:15878920-15880712	1	457	49.81	5.19	-0.817	135-193	Nucl				D1
AtDof5.3	TMO6	AT5G60200	chr5:24241078-24241951	1	257	28.2	8.87	-0.742	52-110	Nucl				C1
AtDof5.4	OBP4	AT5G60850	chr5:24480578-24481501	0	307	32.74	6.54	-0.639	48-106	Nucl				A
AtDof5.5	CDF1	AT5G62430	chr5:25070787-25069298	1	298	33.64	9.03	-0.799	51-109	Nucl				D1
AtDof5.6	HCA2	AT5G62940	chr5:25258504-25257183	1	372	39.8	8.28	-0.701	70-128	Nucl				C1
AtDof5.7	–	AT5G65590	chr5:26213034-26212084	0	316	34.85	9.05	-0.772	38-96	Nucl				B2
AtDof5.8	SCAP1	AT5G66940	chr5:26728666-26727989	0	225	24.12	9.26	-0.503	29-87	Nucl				D2
OsDof1.1	OsDof-3	LOC_Os01g09720	chr01:5014609-5015256	0	215	22.19	9.54	-0.2	27-84	Nucl				D2
OsDof1.2	OsDof-2	LOC_Os01g15900	chr01:8952712-8949249	1	551	59.97	4.98	-0.748	165-223	Nucl	LOC_Os07g48570	WGD	0.2527	D1
OsDof1.3	OsDof-4, RDD1	LOC_Os01g17000	chr01:9733832-9738226	1	490	52.76	6.66	-0.335	111-169	Nucl				D1
OsDof1.4	OsDof-5	LOC_Os01g48290	chr01:27676501-27677028	0	175	17.32	10.06	-0.379	81-140	Nucl				D1
OsDof1.5	OsDof-6	LOC_Os01g55340	chr01:31851619-31850537	0	211	23.09	9.15	-0.759	106-164	Nucl				D1
OsDof1.6	OsDof-1	LOC_Os01g64590	chr01:37473368-37472376	0	320	33.78	4.71	-0.35	22-80	Nucl	LOC_Os05g36900	WGD	0.1694	C2.2
OsDof2.1	OsDof-10, RPBF, DOF3	LOC_Os02g15350	chr02:8593925-8590287	0	373	36.84	6.88	-0.115	42-100	Nucl				C2.2
OsDof2.2	OsDof-9	LOC_Os02g45200	chr02:27438687-27435303	1	381	38.55	8.91	-0.398	77-135	Nucl	LOC_Os04g47990	WGD	0.1344	C2.1
OsDof2.3	OsDof-7	LOC_Os02g47810	chr02:29241762-29238064	1	350	36.7	9.01	-0.345	60-118	Nucl				C1
OsDof2.4	OsDof-8	LOC_Os02g49440	chr02:30208306-30206964	0	282	28.96	9.1	-0.302	42-100	Nucl	LOC_Os06g17410	WGD	0.0975	A
OsDof3.1	OsDof-12	LOC_Os03g07360	chr03:3738779-3741715	1	440	47	7.88	-0.573	103-161	Nucl	LOC_Os10g26620	WGD	0.1737	D1
OsDof3.2	OsDof-14	LOC_Os03g16850	chr03:9360935-9359466	1	403	40.79	9.48	-0.491	88-146	Nucl				B1
OsDof3.3	OsDof-11	LOC_Os03g38870	chr03:21599677-21600792	0	371	36.81	8.82	-0.243	45-103	Nucl				A
OsDof3.4	OsDof-13	LOC_Os03g42200	chr03:23475827-23472278	0	255	25.92	9.69	-0.153	41-99	Nucl	LOC_Os12g39990	WGD	0.2719	D3
OsDof3.5	OsDof-15	LOC_Os03g55610	chr03:31663961-31662275	0	359	36.7	9.5	-0.25	76-134	Nucl				A
OsDof3.6	OsDof-16	LOC_Os03g60630	chr03:34455535-34456959	0	355	35.1	9.48	-0.276	56-114	Nucl	LOC_Os07g13260	WGD	0.1224	B1
OsDof4.1	OsDof-18	LOC_Os04g47990	chr04:28537554-28534300	1	378	37.6	8.84	-0.386	75-133	Nucl				C2.1
OsDof4.2	OsDof-17	LOC_Os04g58190	chr04:34656922-34654291	1	206	21.65	8.24	-0.509	46-108	Nucl				D2
OsDof5.1	OsDof-19	LOC_Os05g02150	chr05:660255-658106	1	352	36.47	8.79	-0.487	99-157	Nucl				B1
OsDof5.2	OsDof-29	LOC_Os05g36900	chr05:21555554-21556537	0	327	34.16	5.92	-0.324	35-93	Nucl				C2.2
OsDof6.1	OsDof-20	LOC_Os06g17410	chr06:10101312-10102739	0	289	28.83	6.99	-0.2	27-85	Nucl				A
OsDof7.1	OsDof-21	LOC_Os07g13260	chr07:7605698-7604087	0	332	32.94	9.71	-0.172	50-108	Nucl				B1
OsDof7.2	OsDof-22	LOC_Os07g32510	chr07:19362157-19364739	0	359	34.26	8.17	0.007	46-104	Nucl				B2
OsDof7.3	OsDof-23	LOC_Os07g48570	chr07:29081179-29077196	1	476	50.82	5.5	-0.719	105-163	Nucl				D1
OsDof8.1	OsDof-24, OsDof25, MNB1A	LOC_Os08g38220	chr08:24232676-24233972	0	276	28.86	6.74	-0.55	59-116	Nucl	LOC_Os09g29960	WGD	0.0814	D3
OsDof9.1	OsDof-25	LOC_Os09g29960	chr09:18234924-18235879	0	230	23.76	9.3	-0.647	40-97	Nucl	LOC_Os12g39990	WGD	0.5122	D3
OsDof10.1	OsDof-26	LOC_Os10g26620	chr10:13885224-13882332	1	437	46.14	8.31	-0.593	92-150	Nucl				D1
OsDof10.2	OsDof-27	LOC_Os10g35300	chr10:18875014-18873473	1	247	24.66	9.44	-0.331	76-133	Nucl				D2
OsDof12.1	OsDof-28	LOC_Os12g38200	chr12:23458337-23460708	1	348	35.34	9.06	-0.235	92-149	Nucl	LOC_Os03g60630	WGD	0.0368	B1
OsDof12.2	OsDof-30	LOC_Os12g39990	chr12:24724587-24723790	0	265	26.6	9.54	-0.034	49-106	Nucl				D3
a Subcellular localization was predicted using CELLO. b Duplicated modes in Arabidopsis were determined based on studies of Wang et al. (2013) and related references therein. c Following the classification proposed by Lijavetzky et al. (2003).
