# Supplementary material for: Genome-wide identification and comparative evolutionary analysis of the Dof transcription factor family in physic nut and castor bean
Source: PeerJ. 2019 Feb 5;7:e6354. doi: 10.7717/peerj.6354 (PMC6368027; doi:10.7717/peerj.6354)
Supplement: Supplemental Information 16 — Fold change of JcDof genes between five typical flower stages. [file peerj-07-6354-s016.xlsx]

## Sheet: Sheet1
Table S2 Fold change of JcDof genes between five typical flower stages
Gene	PID2 vs IND	STD2 vs IND	PID1 vs IND	STD1 vs IND	PID2 vs PID1	STD2 vs STD1
JcDof5.2	1.06	0.85	0.94	1.29	1.13	0.66
JcDof7.2	0.85	0.23	0.64	1.13	1.33	0.2
JcDof7.4	0.96	0.22	0.66	1.07	1.46	0.2
JcDof2.1	0.69	0.44	0.56	0.55	1.24	0.8
JcDof8.1	0.73	0.22	0.62	0.4	1.19	0.53
JcDof4.1	0.28	0.14	0.56	0.4	0.5	0.36
JcDof7.5	0.46	0.22	0.57	0.84	0.8	0.27
JcDof3.4	1.48	0.64	0.22	0.33	6.63	1.91
JcDof9.2	1.36	0.69	0.29	0.53	4.72	1.32
JcDof5.1	0.69	0.65	0.23	0.31	2.99	2.1
JcDof6.3	0.95	0.68	0.41	0.48	2.31	1.43
JcDof3.2	0.85	0.64	0.56	0.5	1.52	1.28
JcDof8.2	0.79	0.57	0.6	0.47	1.32	1.22
JcDof2.2	0.97	0.35	0.23	0.37	4.25	0.96
JcDof10.1	0.93	0.39	0.4	0.36	2.29	1.08
JcDof3.3	0.7	0.49	0.3	0.39	2.36	1.28
JcDof5.3	0.83	0.61	0.61	0.6	1.37	1
JcDof9.1	0.76	0.46	0.43	0.55	1.77	0.84
JcDof2.3	1.14	0.93	1.02	1	1.11	0.93
JcDof9.3	3.98	3.61	0.95	1.2	4.18	3.01
Differentially expressed genes were shown in red
